# Supplementary material
Source: Springer Nature journal article supplement (https://www.springermedizin.de/resource/supplementary/12889_2014_7452_MOESM3_ESM.pdf/9497418)

# Meta Analysis

Study name

Subgroup within study

Odds ratio and 95% CI

|                             | Odds ratio  | Lower limit | Upper limit |
|-----------------------------|-------------|-------------|-------------|
| Armstrong 2002              | 0.78        | 0.70        | 0.87        |
| Bergmann 2003               | 0.31        | 0.16        | 0.59        |
| Gillman 2001                | 0.66        | 0.58        | 0.76        |
| Hawkins 2009                | 0.75        | 0.66        | 0.85        |
| Hediger 2001                | 0.81        | 0.61        | 1.08        |
| Jwa 2014                    | 0.49        | 0.35        | 0.69        |
| Liese 2001                  | 0.55        | 0.41        | 0.74        |
| McCrary 2012                | 0.40        | 0.29        | 0.55        |
| Novaes 2011                 | 0.56        | 0.25        | 1.26        |
| O'Challaghan 1997           | 0.72        | 0.48        | 1.09        |
| Scholtens 2008              | 0.54        | 0.38        | 0.76        |
| Scott 2012                  | 0.45        | 0.30        | 0.67        |
| Toschke 2002                | 0.70        | 0.59        | 0.84        |
| Twells 2010                 | 0.67        | 0.47        | 0.96        |
| Von kries 1999              | 0.61        | 0.48        | 0.78        |
| Zhao 2013                   | 0.38        | 0.22        | 0.65        |
| <b>UOR (Random effects)</b> | <b>0.61</b> | <b>0.55</b> | <b>0.68</b> |

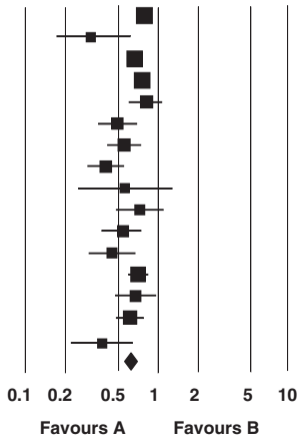

Supplement: MOESM3 [file 9497418]
